# Supplementary material for: Temporal and Spatial Variations of Bacterial and Faunal Communities Associated with Deep-Sea Wood Falls
Source: PLOS journal article supplement (doi:10.1371/journal.pone.0169906), 2017-01-25
Supplement: S1 (10.1371/journal.pone.0169906.s001) [file journal.pone.0169906.s001]

## S1 Text

**Material and Methods: Dissolved Organic Matter analyzes.** Molecular information was evaluated based on the contribution of different elements (CHO, CHON, CHOS, CHOP and CHONS formulae) and by the intensity weighted average (wa) of the Double Bond Equivalents ( $DBE_{wa}$ ) and Aromaticity Index ( $AI_{mod_{wa}}$ ) and elemental ratios  $H/C_{wa}$  and  $O/C_{wa}$  (1–3). Additionally, molecular formulae were associated with different molecular groups in order to provide an overview on the molecular composition of pore water samples (4,5). Molecular groups considered: 1) highly unsaturated compounds ( $AI_{mod} < 0.5$  and  $H/C < 1.5$ ); 2) polyphenols ( $0.67 \geq AI_{mod} > 0.5$ ); 3) condensed aromatics or dissolved black carbon (DBC,  $AI_{mod} \geq 0.67$ ); 4) formulae of unsaturated aliphatics ( $1.5 < H/C < 2$ ,  $O/C < 0.9$ ,  $N=0$ ); 5) peptide molecular formulae ( $1.5 < H/C < 2$ ,  $O/C < 0.9$  and  $N > 0$ ); 6) saturated fatty acids ( $H/C > 2$ ,  $O/C < 0.9$ ), without (saturated FA) or with heteroatoms (N, S or P) (saturated FA-CHOx); 7) formulae of sugars ( $O/C > 0.9$ ), without (sugars) and with heteroatoms (sugars-CHOx). Furthermore, differences in composition regarding oxygen rich (O-rich) or poor (O-poor) compounds, were also evaluated.

## References:

1. McLafferty FW, Turecek F. Interpretation of mass spectra. Fourth Edi. Vetter W, editor. Mill Valley, California; 1993. 379 p.
2. Koch BP, Dittmar T. From mass to structure: an aromaticity index for high-resolution mass data of natural organic matter. *Rapid Commun Mass Spectrom.* 2016;30(1):250.
3. Koch BP, Dittmar T. From mass to structure: an aromaticity index for high-resolution mass data of natural organic matter. *Rapid Commun Mass Spectrom.* 2006;20(5):926–32.
4. Seidel M, Beck M, Riedel T, Waska H, Suryaputra IGNA, Schnetger B, et al. Biogeochemistry of dissolved organic matter in an anoxic intertidal creek bank. *Geochim Cosmochim Acta.* 2014;140:418–34.
5. Rossel PE, Bienhold C, Boetius A, Dittmar T. Dissolved organic matter in pore water of Arctic Ocean sediments: Environmental influence on molecular composition. *Org Geochem.* 2016;97:41–52.
